# Supplementary material
Source: PubMed Central journal article supplement (PMC8661020)

## Supporting information

### **Cholesterol and sphingomyelin are critical for Fcγ receptor-mediated phagocytosis of *Cryptococcus neoformans* by macrophages**

Arielle M. Bryan<sup>1\*§</sup>, Jeehyun Karen You<sup>1\*§</sup>, Guangtao Li<sup>2</sup>, JiHyun Kim<sup>2§</sup>, Ashutosh Singh<sup>1§</sup>, Johannes Morstein<sup>3§</sup>, Dirk Trauner<sup>3</sup>, Nívea Pereira de Sá<sup>1</sup>, Tyler G. Normile<sup>1</sup>, Amir M. Farnoud<sup>1§</sup>, Erwin London<sup>2</sup>, Maurizio Del Poeta<sup>1,4,5▫</sup>

<sup>1</sup>Department of Microbiology and Immunology, Stony Brook University, Stony Brook, NY, USA

<sup>2</sup>Department of Biochemistry and Cell Biology, Stony Brook University, Stony Brook, NY, USA

<sup>3</sup>Department of Chemistry, New York University, New York, NY, USA

<sup>4</sup>Division of Infectious Diseases, Stony Brook University, Stony Brook, NY, USA

<sup>5</sup>Veteran Affairs Medical Center, Northport, NY, USA

▫Corresponding author: Maurizio Del Poeta, MD ([maurizio.delpoeta@stonybrook.edu](mailto:maurizio.delpoeta@stonybrook.edu))

§Present address:

AMB: Ingenious Targeting Laboratory, Ronkonkoma, NY, USA

JKY: Case Western Reserve University, Cleveland, OH, USA

JHK: National Institute of Diabetes and Digestive and Kidney Diseases, National Institutes of Health, Bethesda, MD, USA

AS: Department of Biochemistry, University of Lucknow, Lucknow, Uttar Pradesh, India

JM: Department of Cellular and Molecular Pharmacology and Howard Hughes Medical Institute, University of California, San Francisco, California, USA.

AMF: Department of Chemical and Biomolecular Engineering, Ohio University, Athens, OH, USA

\*AMB and JKY are co-first authors and contributed equally.

**Running title:** Lipid rafts are critical for phagocytosis of *C. neoformans*

**Keywords:** lipid raft, cholesterol, sphingomyelin, Fc-gamma receptor, phagocytosis, macrophage, fungi

**Figure S1. Cholesterol and sphingomyelin are important for antibody-mediated phagocytosis. A)**

Macrophages (J774.1) treated with either 10 or 30 mM methyl-beta-cyclodextrin (M $\beta$ CD) were co-incubated with antibody-opsonized *C. neoformans* H99 at a 1:1 ratio and allowed to interact for 2 hours. Cells were then fixed and stained with Giemsa and phagocytic index was calculated by microscopic observation (n=3). **B)** Macrophages (J774.1) treated with bacterial sphingomyelinase (bSMase) as indicated were co-incubated with antibody-opsonized *C. neoformans* H99 at a 1:1 ratio and allowed to interact for 2 hours. Cells were then fixed and stained with Giemsa and phagocytic index was calculated by microscopic observation (n=3). Error bars represent the standard error of the mean (SEM), and statistical significance was determined using one-way ANOVA with Tukey's multiple comparisons test. \**P* < 0.05 compared to the untreated control. All *P*-values were adjusted for multiplicity.

**Figure S2. Structures of key lipids in this study. A)** d18:1/16:0 sphingomyelin (C16 SM) **B)** d18:1/16:0 ceramide (C16 Cer) **C)** cholesterol **D)** 7-dehydrocholesterol **E)** coprostanol **F)** Azobenzene-sphingomyelin (AzoSM) is synthesized through a design principle called "azologization" (denoted with arrow 'a'). The structures of the cis and trans isomers of AzoSM upon light exposure are shown.

**Figure S3. Repletion with raft-altering sterols affects GPMV levels. A)** Macrophages (MH-S) were pre-treated with either 10 mM M $\beta$ CD or 30 mM M $\beta$ CD to deplete cholesterol. Monolayers were then washed and subject to giant plasma membrane vesicle formation using 25 mM PFA and 2 mM DTT. Nanodomains were assessed via FRET with DPH as the FRET donor and ODRB as the FRET acceptor. The ratio of DPH fluorescence intensity in the presence vs. absence of ODRB was calculated ( $F/F_0$ ). Raw  $F/F_0$  values for Figure 4A are reported (n=3). Error bars represent SEM. Similar unnormalized  $F/F_0$  values at high temperature indicate that the amount of FRET acceptor bound to GPMV was similar in the samples. **B)** Macrophages were pre-treated with 10 mM M $\beta$ CD to deplete cholesterol and then washed and incubated with 2.5 mM M $\beta$ CD loaded with 0.2 mM of indicated sterol. Monolayers were then washed and subject to giant plasma membrane vesicle formation using 25 mM PFA and 2 mM DTT. Nanodomains were assessed via FRET with DPH as the FRET donor and ODRB as the FRET acceptor. The ratio of DPH fluorescence intensity in the presence vs. absence of ODRB was calculated ( $F/F_0$ ). Raw  $F/F_0$  values for Figure 4B are reported (n=3). Error bars represent SEM. Similar unnormalized  $F/F_0$  values at high temperature indicate that the amount of FRET acceptor bound to GPMV was similar in the samples.

**Figure S4. Treatment with bacterial sphingomyelinase does not affect nanodomain stability.**

Macrophages (MH-S) were pre-treated with either 250 mU/ml or 500 mU/ml bacterial sphingomyelinase (bSMase). Monolayers were then washed and subject to giant plasma membrane vesicle formation using 25 mM PFA and 2 mM DTT. **A)** Nanodomain stability was assessed via FRET with DPH as the FRET donor and ODRB as the FRET acceptor. The ratio of DPH fluorescence intensity in the presence vs. absence of ODRB was calculated ( $F/F_0$ ).  $F/F_0$  values were normalized to the final  $F/F_0$  value at 64°C (n=3). Error bars represent SEM. **B)** Relative domain levels were estimated using the polynomial fits from A as described under *Experimental procedures*. Error bars represent SEM. **C)** Raw  $F/F_0$  values are reported for Figure S4A (n=3). Error bars represent SEM. Similar unnormalized  $F/F_0$  values at high temperature indicate that the amount of FRET acceptor bound to GPMV was similar in the samples.

**Figure S5. Lipid depleting treatments do not decrease amount of Fc $\gamma$ R.** Median fluorescence intensity for 50,000 live macrophage cells for untreated control, 10 mM M $\beta$ CD, 30 mM M $\beta$ CD, 250 mU/ml bSMase, and 500 mU/ml bSMase were labeled with CD45-PE Cy7, CD16/32-APC, and CD11b-BV510 and quantified using FlowJo (n=3). Error bars represent SEM.

**Figure S6. BSA-IgG immune complexes induce Fc receptor  $\gamma$  chain phosphorylation.** Macrophages (MH-S) were stimulated with BSA-IgG immune complex (IC) for 5-30 min. Fc receptor  $\gamma$  chain (FcR $\gamma$ ) was immunoprecipitated (IP) and evaluated for phosphorylation of the tyrosine residues. IP samples or lysates (lys)

were probed for FcR $\gamma$  or phospho-tyrosine (p-Tyr). IP control defined as IP buffer with IP antibody without cell lysate. Representative blot from 2 experiments.

**Figure S7. Exclusion of sphingomyelin from rafts affects Fc $\gamma$  receptor-mediated signaling. A)**

Macrophages (MH-S) treated with the AzoSM exchange protocol as described in *Experimental Procedures* were either unexposed, exposed to UV light, or exposed to UV light followed by blue light. Control samples were mock treated. Cells were then stimulated with BSA-IgG immune complex (IC) stimulation for 5 min. Fc receptor  $\gamma$  chain (FcR $\gamma$ ) were immunoprecipitated and evaluated for phosphorylation of the tyrosine residue. Lysates and IP samples were probed for phospho-tyrosine (p-Tyr) and/or FcR $\gamma$ . Detection was performed using ECL, a chemiluminescent substrate. Representative immunoblots are shown. **B)** Immunoblots were quantified using ImageJ software; p-Tyr was normalized by FcR $\gamma$  (n=4 experiments). Error bars represent the standard error of the mean and statistical significance was determined using one-way ANOVA with Tukey's multiple comparisons test. \* $P < 0.05$ , \*\* $P < 0.01$ , \*\*\*\* $P < 0.0001$ . All  $P$ -values were adjusted for multiplicity.

**Figure S8. M $\alpha$ CD-based exchange protocol successfully introduces AzoSM into cells.** Endogenous C16 sphingomyelin (SM) was exchanged for azobenzene-sphingomyelin (AzoSM) in macrophages (MH-S) using M $\alpha$ CD as described in *Experimental Procedures*. AzoSM in cellular extracts were then measured using high-performance lipid chromatography (HPLC) at  $\lambda=365$ . **A)** Representative HPLC readout for untreated control sample. **B)** Representative HPLC readout for sample following AzoSM exchange. AzoSM elutes at ~10.6 minutes.

Figure S1

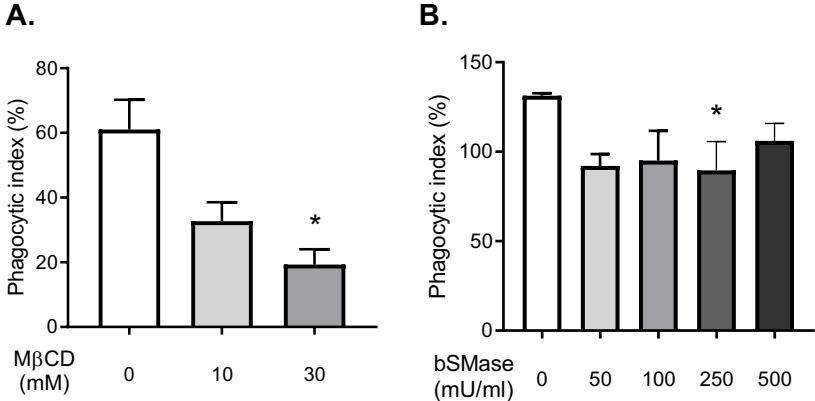

Figure S2

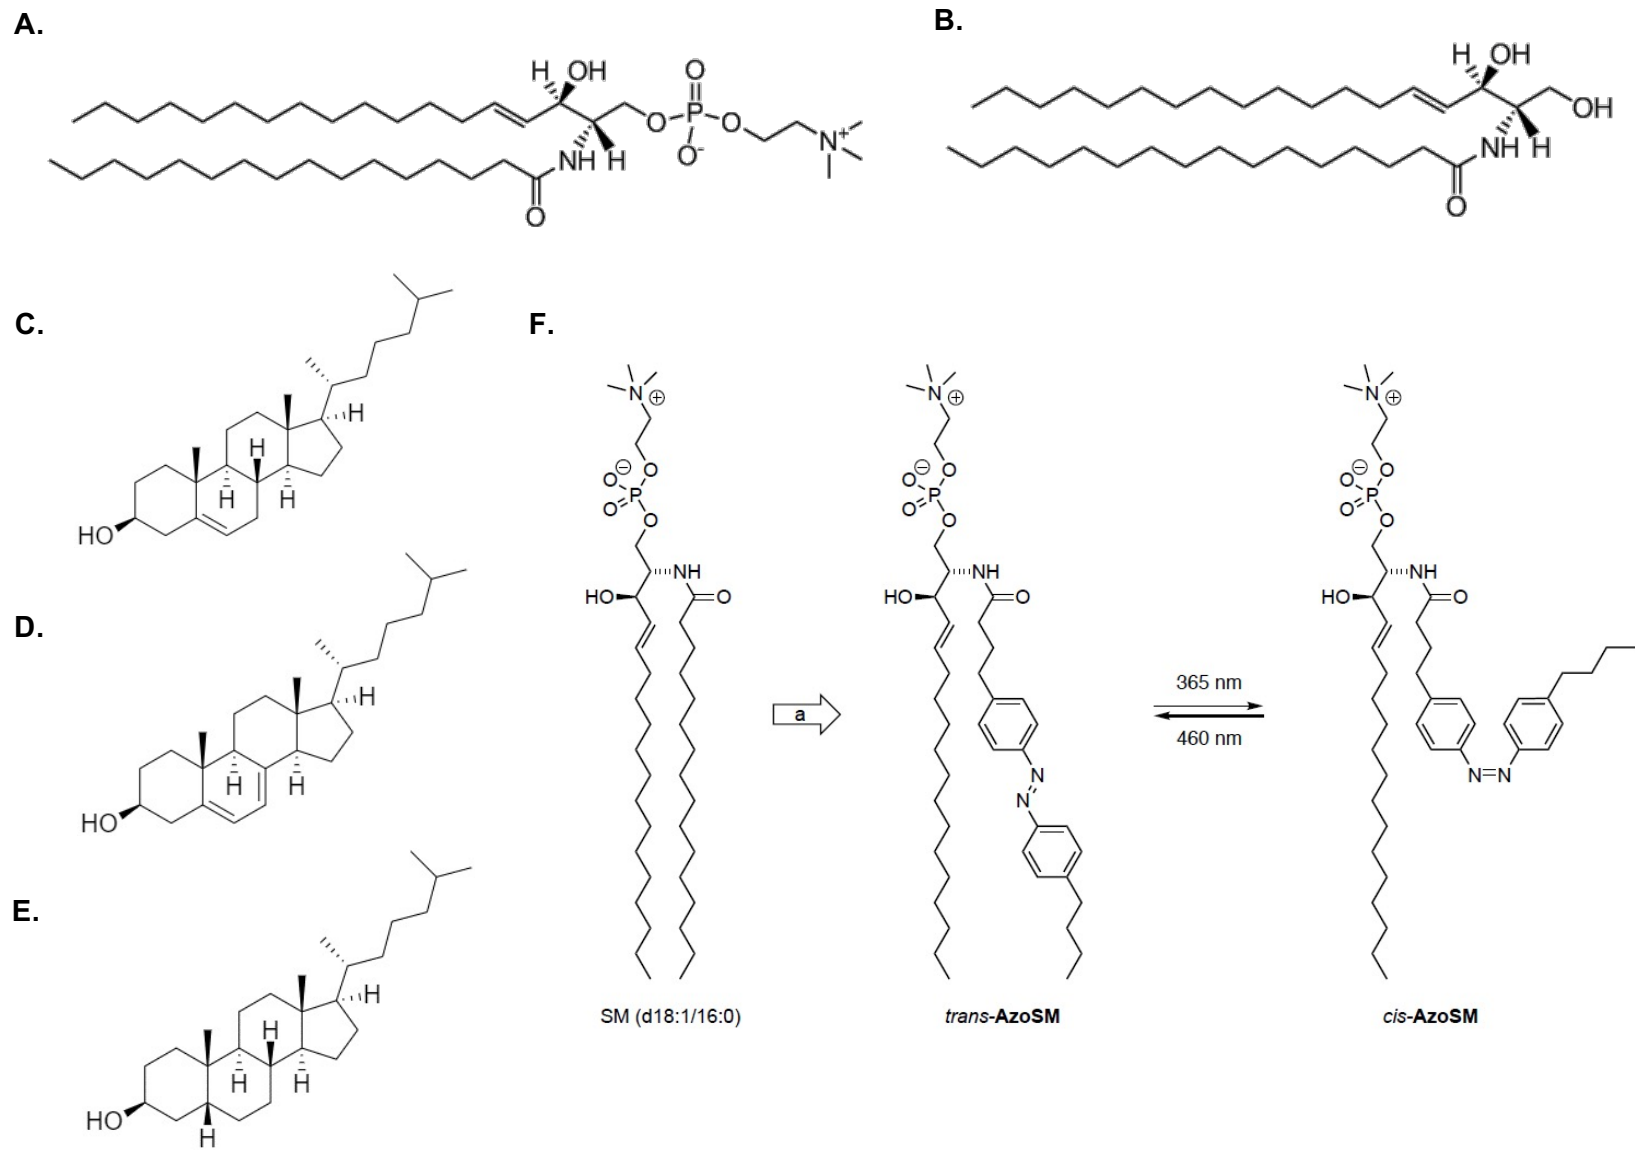

Figure S3

A.

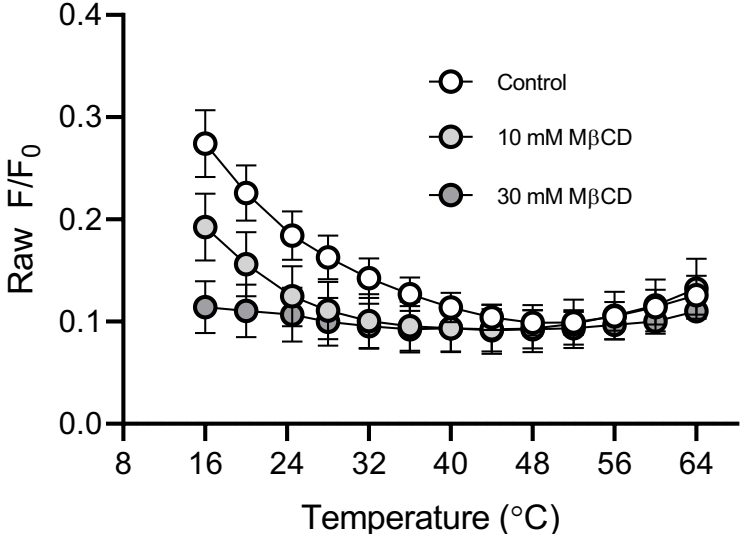

B.

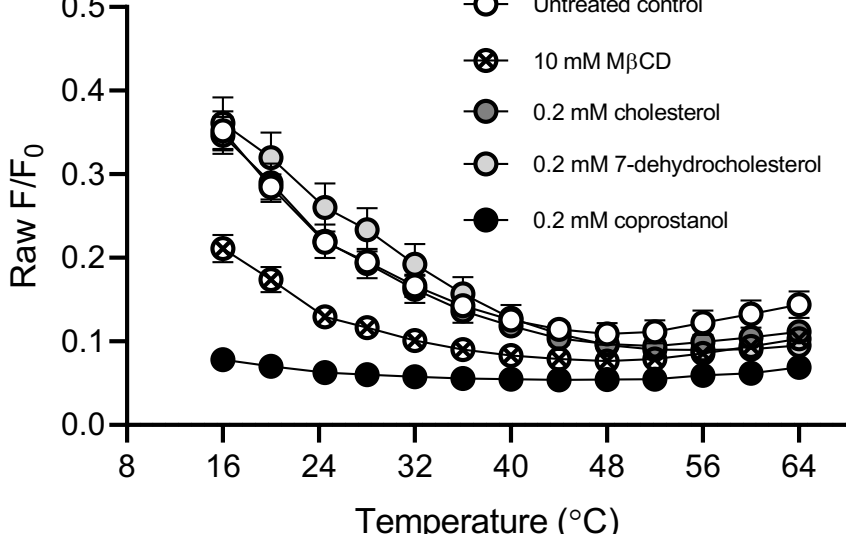

Figure S4

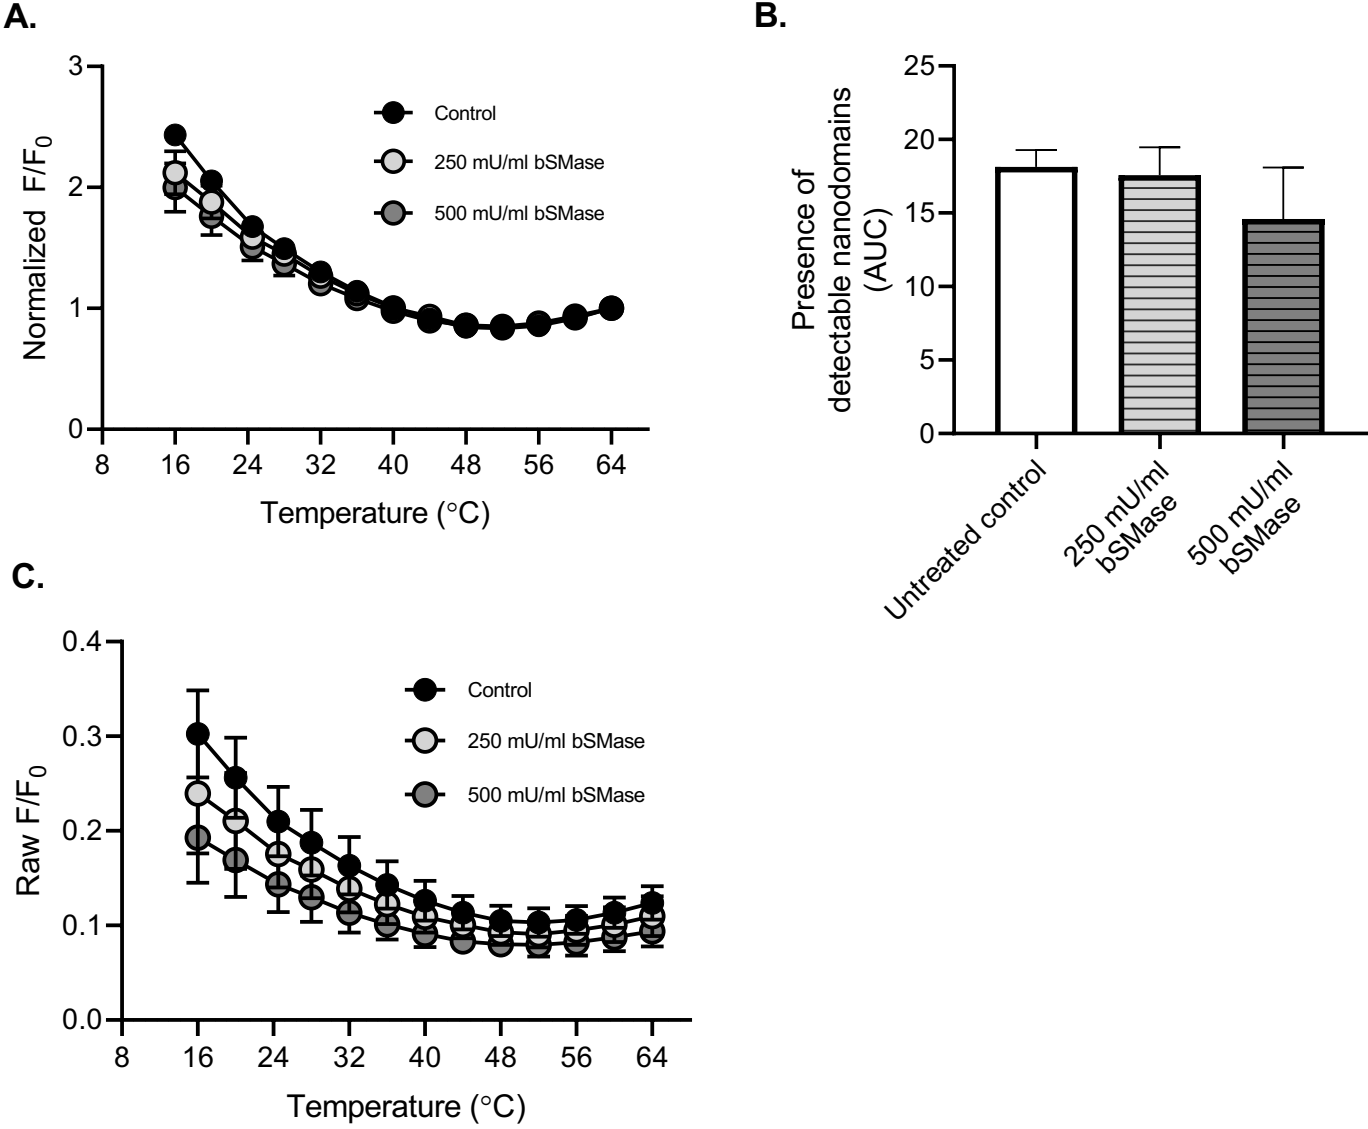

Figure S5

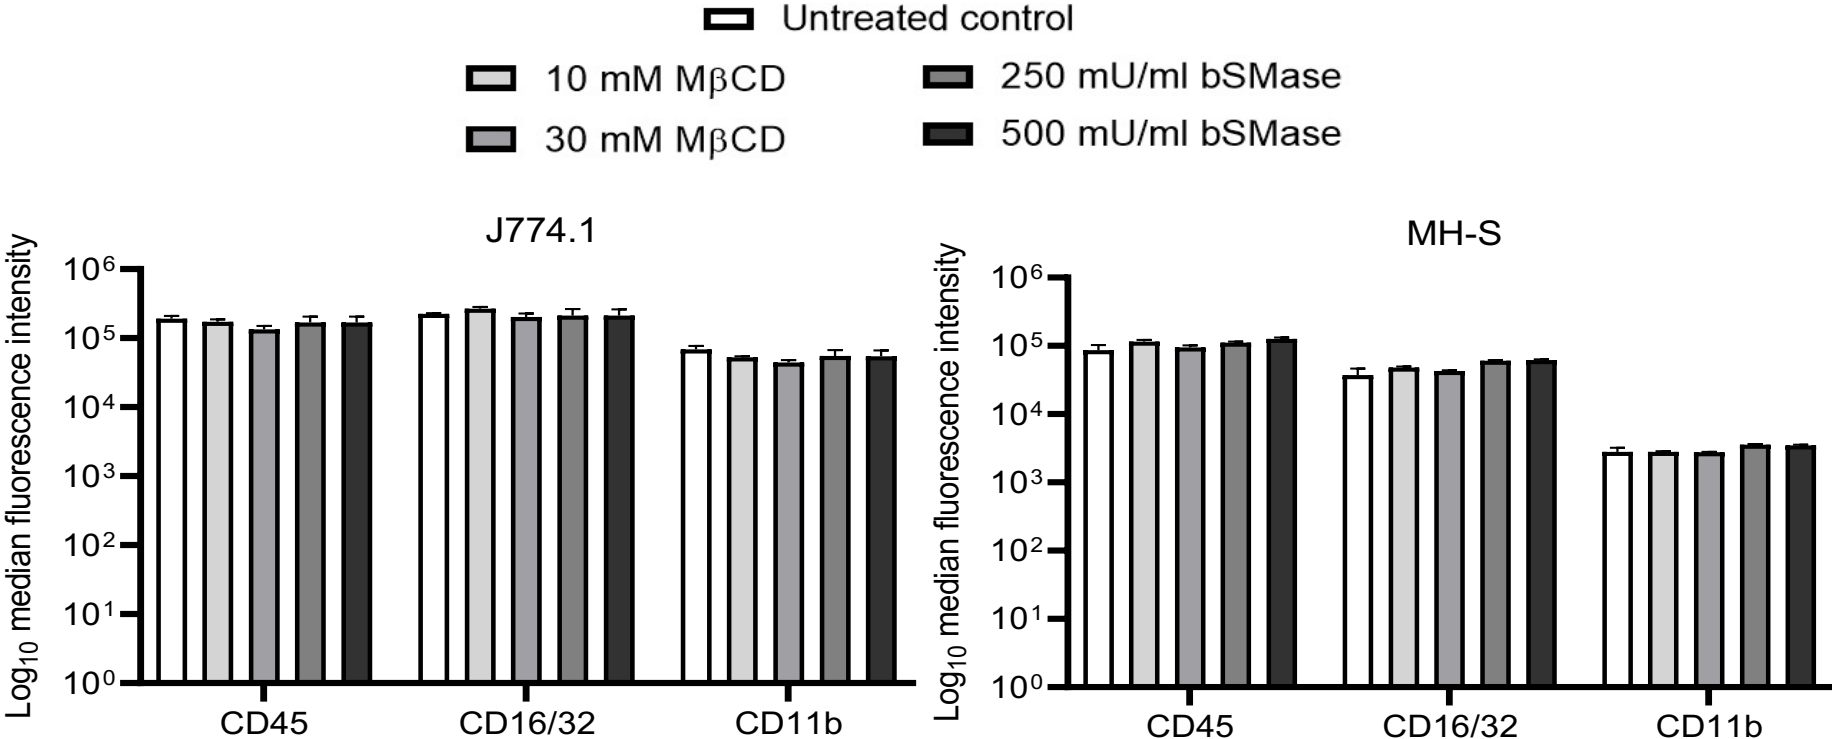



Figure S6

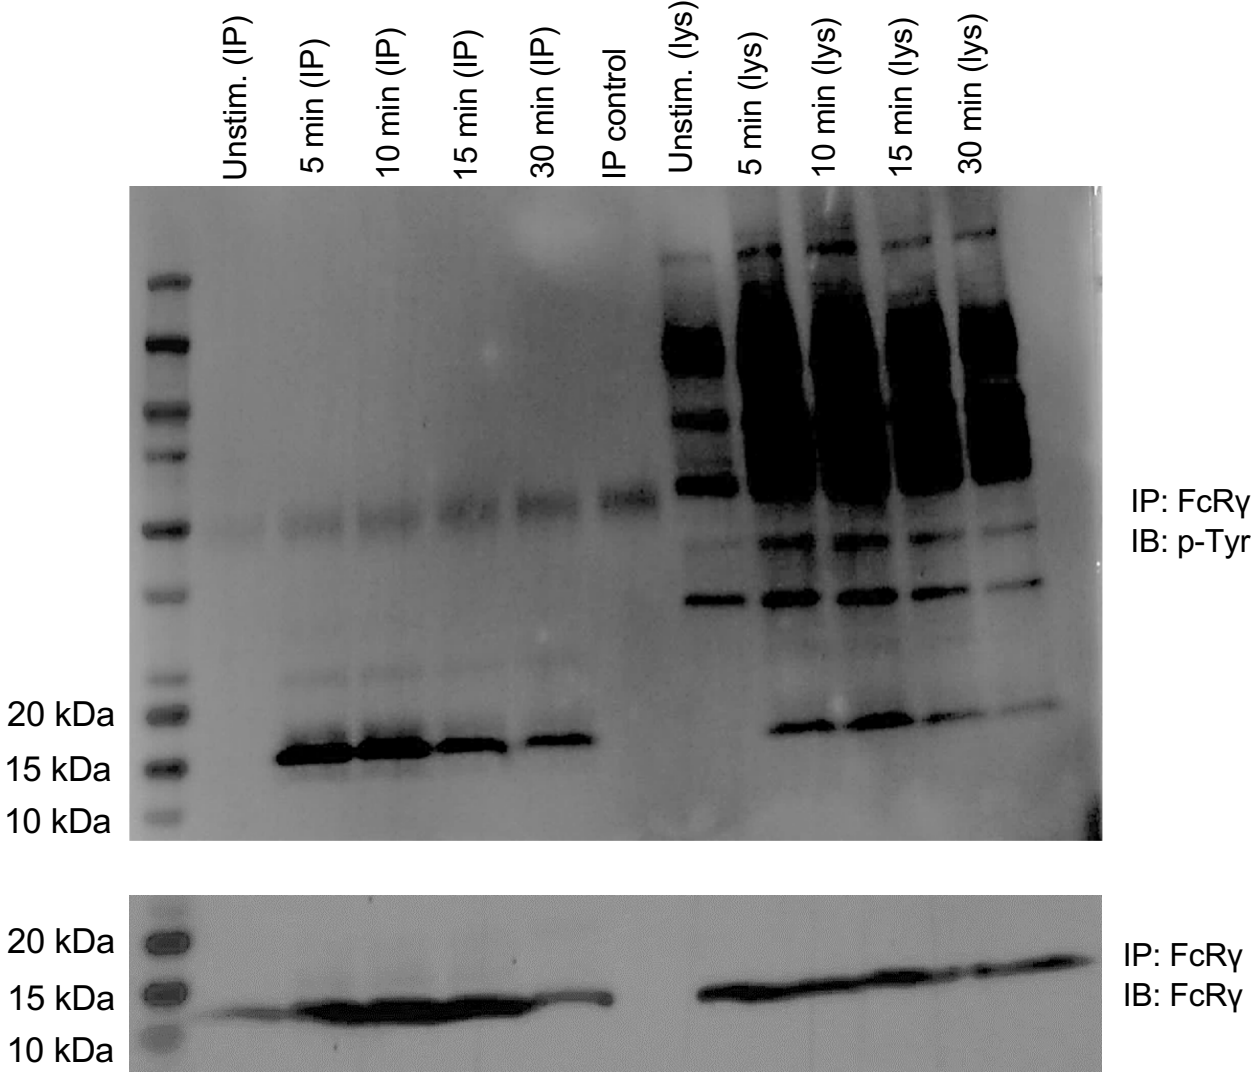

Figure S7

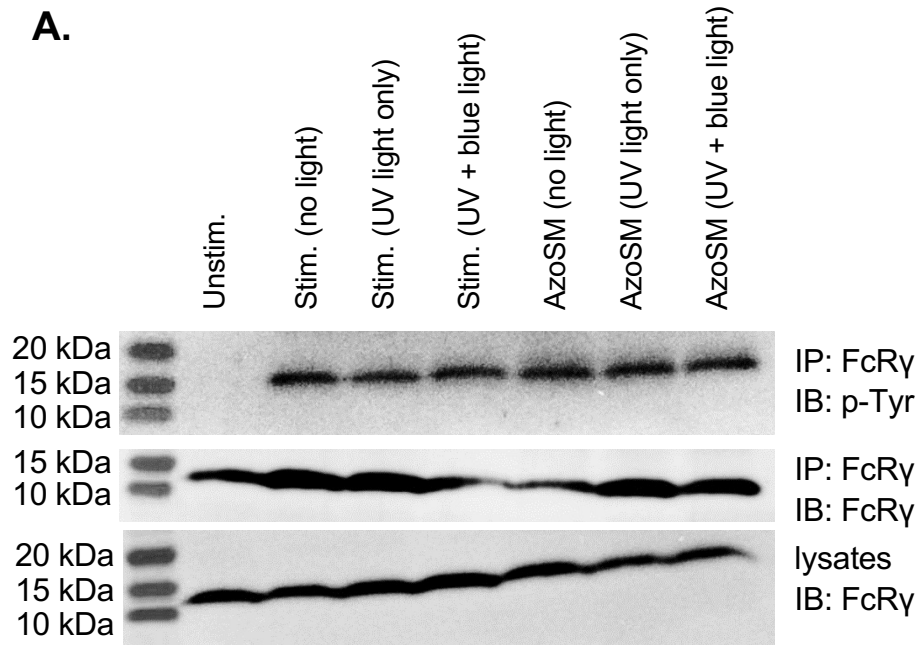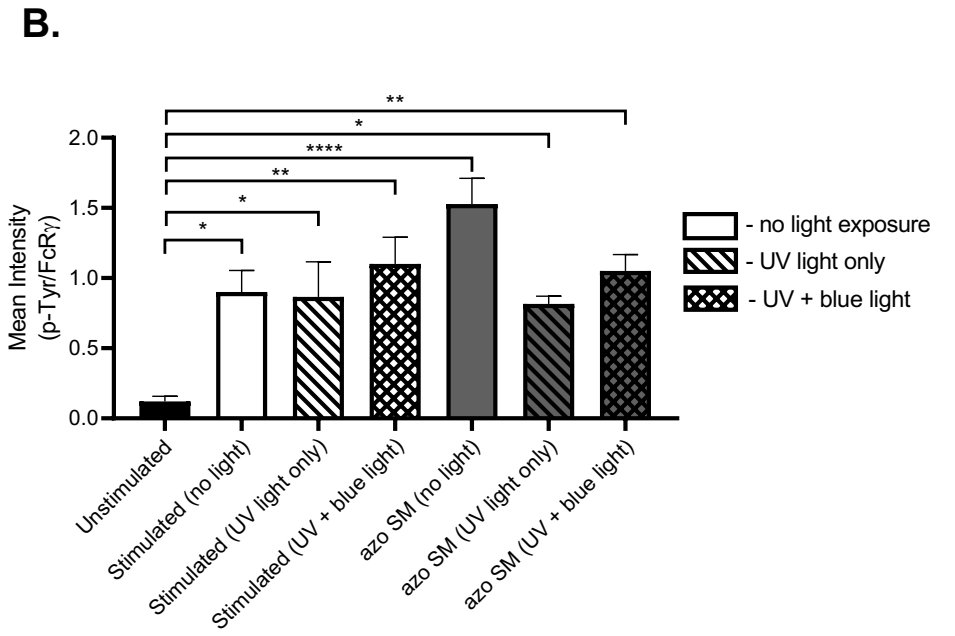

Figure S8

A.

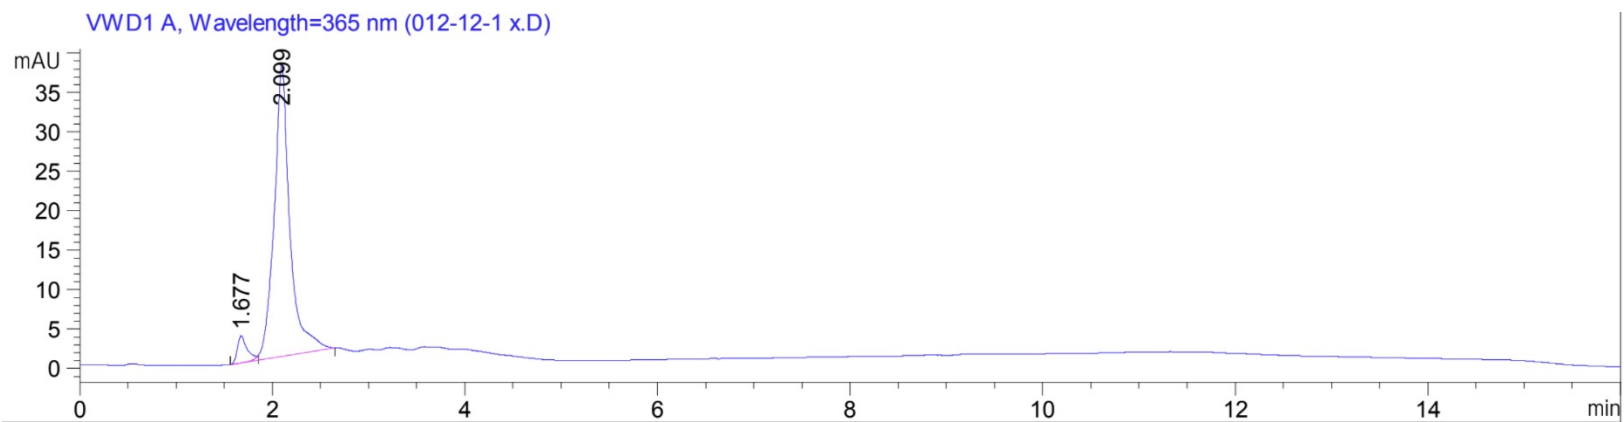

B.

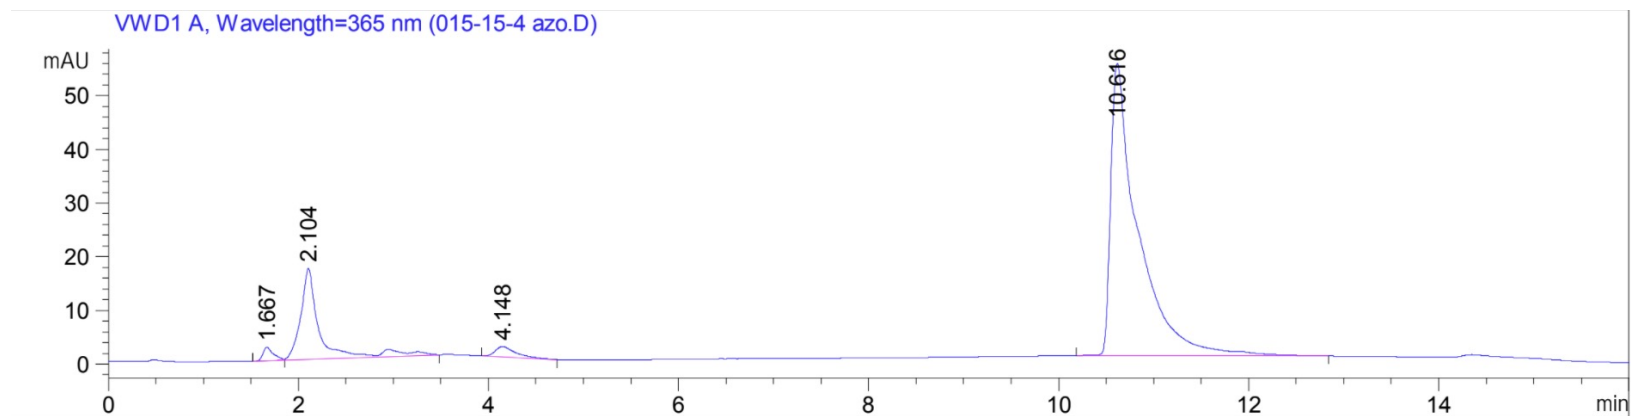

Supplement: mmc3.pdf [file mmc3.pdf]
